# Supplementary material for: Changes in soil carbon and nutrients following six years of litter removal and addition in a tropical semi-evergreen rain forest
Source: Copernicus journal article supplement (doi:10.5194/bg-2016-229), 2016-07-29
Supplement: Supplementary file 1 [file bg-2016-229-supplement.pdf]

Tanner, Sheldrake & Turner, Supplementary material. Table with original soils data.

Measured bulk density (only one replicate below 5 cm) and nutrient concentrations

LR = litter removal, Con = control, LA = litter addition, # = plot

| Depth      | Bulk density (g cm <sup>-3</sup> ) | LR # 4 | LR # 6 | LR # 8 | LR # 12 | LR # 13 | 'extra' pit |
|------------|------------------------------------|--------|--------|--------|---------|---------|-------------|
| 0-5 cm     |                                    | 0.68   | 0.73   | 0.7    | 0.67    | 0.75    |             |
| 5-10 cm    |                                    |        |        |        |         |         | 0.84        |
| 10-15 cm   |                                    |        |        |        |         |         | 0.83        |
| 15-20 cm   |                                    |        |        |        |         |         | 0.89        |
| 20-30 cm   |                                    |        |        |        |         |         | 1.06        |
| 30-50 cm   |                                    |        |        |        |         |         | 1.21        |
| 50-100 cm  |                                    |        |        |        |         |         | 1.21        |
| 100-150 cm |                                    |        |        |        |         |         | 1.24        |
| 150-200 cm |                                    |        |        |        |         |         | 1.24        |

| Depth  | Bulk density (g cm <sup>-3</sup> ) | Con # 1 | Con # 5 | Con # 7 | Con # 11 | Con # 15 |
|--------|------------------------------------|---------|---------|---------|----------|----------|
| 0-5 cm |                                    | 0.66    | 0.6     | 0.55    | 0.73     | 0.74     |
| Depth  | Bulk density (g cm <sup>-3</sup> ) | LA # 2  | LA # 3  | LA # 9  | LA # 10  | LA # 14  |
| 0-5 cm |                                    | 0.49    | 0.63    | 0.55    | 0.53     | 0.7      |

| Depth      | Calcium (Mehlich III cmol kg <sup>-1</sup> ) | LR # 4 | LR # 6 | LR # 8 | LR # 12 | LR # 13 |
|------------|----------------------------------------------|--------|--------|--------|---------|---------|
| 0-5 cm     |                                              | 5.03   | 4.66   | 2.72   | 5.38    | 4.50    |
| 5-10 cm    |                                              | 3.93   | 2.70   | 2.32   | 5.51    | 4.01    |
| 10-15 cm   |                                              | 3.58   | 2.60   | 2.71   | 4.05    | 4.83    |
| 15-20 cm   |                                              | 2.80   | 1.98   | 1.74   | 6.00    | 3.85    |
| 20-30 cm   |                                              | 1.80   | 1.34   | 1.50   | 4.09    | 2.86    |
| 30-50 cm   |                                              | 1.21   | 0.42   | 0.55   | 2.01    | 1.98    |
| 50-100 cm  |                                              | 0.56   | 0.21   | 0.42   | 1.93    | 1.84    |
| 100-150 cm |                                              | 0.08   | 0.08   | 0.29   | 1.87    | 0.27    |
| 150-200 cm |                                              | 0.05   | 0.06   | ND     | 1.18    | 0.28    |

| Depth      | Calcium (Mehlich III cmol kg <sup>-1</sup> ) | Con # 1 | Con # 5 | Con # 7 | Con # 11 | Con # 15 |
|------------|----------------------------------------------|---------|---------|---------|----------|----------|
| 0-5 cm     |                                              | 3.81    | 5.44    | 5.82    | 6.11     | 9.87     |
| 5-10 cm    |                                              | 2.55    | 2.93    | 5.14    | 3.73     | 6.15     |
| 10-15 cm   |                                              | 1.85    | 2.62    | 3.66    | 5.45     | 6.27     |
| 15-20 cm   |                                              | 1.71    | 1.62    | 2.60    | 2.18     | 5.91     |
| 20-30 cm   |                                              | 1.57    | 0.97    | 1.90    | 1.56     | 4.38     |
| 30-50 cm   |                                              | 0.59    | 0.49    | 0.59    | 0.92     | 3.22     |
| 50-100 cm  |                                              | 0.48    | 0.35    | 0.41    | 0.44     | 1.67     |
| 100-150 cm |                                              | ND      | 0.12    | 0.23    | 0.11     | 1.09     |
| 150-200 cm |                                              | ND      | 0.12    | 0.19    | 0.06     | 0.60     |

| Depth      | Calcium (Mehlich III cmol kg <sup>-1</sup> ) | LA # 2 | LA # 3 | LA # 9 | LA # 10 | LA # 14 |
|------------|----------------------------------------------|--------|--------|--------|---------|---------|
| 0-5 cm     |                                              | 10.89  | 10.17  | 8.34   | 13.94   | 10.84   |
| 5-10 cm    |                                              | 4.34   | 7.09   | 4.43   | 5.19    | 8.92    |
| 10-15 cm   |                                              | 3.46   | 5.19   | 4.06   | 3.61    | 6.31    |
| 15-20 cm   |                                              | 2.58   | 5.27   | 3.17   | 1.39    | 7.44    |
| 20-30 cm   |                                              | 1.57   | 2.69   | 2.36   | 1.27    | 3.51    |
| 30-50 cm   |                                              | 0.41   | 1.75   | 1.84   | 0.70    | 2.90    |
| 50-100 cm  |                                              | 0.26   | 1.38   | 1.69   | 0.33    | 1.56    |
| 100-150 cm |                                              | 0.14   | 0.70   | 1.18   | ND      | 0.69    |
| 150-200 cm |                                              | 0.13   | 0.33   | 0.64   | ND      | 0.68    |



| Depth      | Carbon total (%) | LR # 4 | LR # 6 | LR # 8 | LR # 12 | LR # 13 |
|------------|------------------|--------|--------|--------|---------|---------|
| 0-5 cm     |                  | 4.14   | 4.5    | 4.61   | 3.61    | 4.1     |
| 5-10 cm    |                  | 2.59   | 2.79   | 2.91   | 2.93    | 2.72    |
| 10-15 cm   |                  | 1.94   | 2.17   | 2.6    | 2.6     | 2.3     |
| 15-20 cm   |                  | 1.63   | 1.76   | 1.89   | 2.18    | 1.84    |
| 20-30 cm   |                  | 1.35   | 1.2    | 1.48   | 1.53    | 1.45    |
| 30-50 cm   |                  | 0.99   | 0.78   | 1.08   | 1.05    | 0.86    |
| 50-100 cm  |                  | 0.6    | 0.54   | 0.74   | 0.62    | 0.57    |
| 100-150 cm |                  | 0.34   | 0.24   | 0.51   | 0.4     | 0.23    |
| 150-200 cm |                  | 0.24   | 0.25   | ND     | 0.29    | 0.19    |

| Depth      | Carbon total (%) | Con # 1 | Con # 5 | Con # 7 | Con # 11 | Con # 15 |
|------------|------------------|---------|---------|---------|----------|----------|
| 0-5 cm     |                  | 4.68    | 5.57    | 5.84    | 4.86     | 4.81     |
| 5-10 cm    |                  | 2.96    | 3.29    | 3.63    | 2.68     | 2.55     |
| 10-15 cm   |                  | 2.28    | 2.88    | 2.69    | 2.46     | 2.07     |
| 15-20 cm   |                  | 1.97    | 2.48    | 2.19    | 1.98     | 1.52     |
| 20-30 cm   |                  | 1.66    | 1.67    | 1.62    | 1.46     | 0.99     |
| 30-50 cm   |                  | 1.05    | 0.99    | 0.77    | 0.89     | 0.56     |
| 50-100 cm  |                  | 0.64    | 0.66    | 0.49    | 0.42     | 0.55     |
| 100-150 cm |                  | ND      | 0.29    | 0.29    | 0.29     | 0.32     |
| 150-200 cm |                  | ND      | 0.25    | 0.26    | 0.22     | 0.32     |

| Depth      | Carbon total (%) | LA # 2 | LA # 3 | LA # 9 | LA # 10 | LA # 14 |
|------------|------------------|--------|--------|--------|---------|---------|
| 0-5 cm     |                  | 6.69   | 5.87   | 6.51   | 4.69    | 5.95    |
| 5-10 cm    |                  | 3.3    | 3.7    | 3.31   | 3.01    | 3.63    |
| 10-15 cm   |                  | 2.64   | 2.76   | 2.86   | 2.44    | 3.01    |
| 15-20 cm   |                  | 2.17   | 2.42   | 2.02   | 2.42    | 2.39    |
| 20-30 cm   |                  | 1.51   | 1.61   | 1.42   | 1.52    | 1.49    |
| 30-50 cm   |                  | 0.95   | 0.91   | 0.84   | 0.82    | 0.98    |
| 50-100 cm  |                  | 0.68   | 0.75   | 0.57   | 0.53    | 0.56    |
| 100-150 cm |                  | 0.28   | 0.36   | 0.36   | ND      | 0.26    |
| 150-200 cm |                  | 0.24   | 0.31   | 0.35   | ND      | 0.2     |

| Depth      | Magnesium (Mehlich III cmol kg <sup>-1</sup> ) | LR # 4 | LR # 6 | LR # 8 | LR # 12 | LR # 13 |
|------------|------------------------------------------------|--------|--------|--------|---------|---------|
| 0-5 cm     |                                                | 2.43   | 2.46   | 1.64   | 2.90    | 2.57    |
| 5-10 cm    |                                                | 2.14   | 1.77   | 1.52   | 3.08    | 2.43    |
| 10-15 cm   |                                                | 2.07   | 2.20   | 1.67   | 2.80    | 2.96    |
| 15-20 cm   |                                                | 1.80   | 1.99   | 1.38   | 3.63    | 2.83    |
| 20-30 cm   |                                                | 1.47   | 1.73   | 1.48   | 3.45    | 2.62    |
| 30-50 cm   |                                                | 1.52   | 1.33   | 1.04   | 1.74    | 2.53    |
| 50-100 cm  |                                                | 1.38   | 1.03   | 0.95   | 2.59    | 2.14    |
| 100-150 cm |                                                | 0.96   | 0.51   | 0.93   | 2.47    | 0.78    |
| 150-200 cm |                                                | 0.69   | 0.29   | ND     | 1.57    | 0.78    |

| Magnesium (Mehlich III cmol kg-1) | Con # 1 | Con # 5 | Con # 7 | Con # 11 | Con # 15 |
|-----------------------------------|---------|---------|---------|----------|----------|
| 0-5 cm                            | 2.16    | 2.45    | 3.23    | 4.01     | 4.38     |
| 5-10 cm                           | 1.78    | 1.83    | 3.10    | 3.28     | 3.23     |
| 10-15 cm                          | 1.44    | 1.89    | 2.63    | 3.23     | 3.58     |
| 15-20 cm                          | 1.43    | 1.43    | 2.30    | 2.57     | 3.43     |
| 20-30 cm                          | 1.43    | 1.46    | 2.26    | 2.43     | 3.20     |
| 30-50 cm                          | 0.91    | 1.67    | 1.16    | 1.62     | 2.76     |
| 50-100 cm                         | 0.93    | 1.56    | 0.93    | 1.26     | 1.66     |
| 100-150 cm                        | ND      | 0.92    | 0.81    | 0.63     | 1.26     |
| 150-200 cm                        | ND      | 0.69    | 0.62    | 0.40     | 0.78     |

| Magnesium (Mehlich III cmol kg-1) | LA # 2 | LA # 3 | LA # 9 | LA # 10 | LA # 14 |
|-----------------------------------|--------|--------|--------|---------|---------|
| 0-5 cm                            | 4.33   | 2.78   | 3.44   | 4.68    | 3.63    |
| 5-10 cm                           | 2.78   | 2.48   | 2.27   | 2.33    | 3.35    |
| 10-15 cm                          | 2.52   | 2.20   | 2.31   | 1.89    | 2.94    |
| 15-20 cm                          | 2.33   | 2.33   | 2.21   | 1.05    | 3.02    |
| 20-30 cm                          | 2.20   | 2.27   | 2.15   | 0.92    | 2.42    |
| 30-50 cm                          | 1.72   | 2.18   | 2.03   | 1.17    | 3.38    |
| 50-100 cm                         | 1.10   | 1.83   | 2.10   | 0.91    | 1.77    |
| 100-150 cm                        | 0.70   | 1.29   | 1.68   | ND      | 1.13    |
| 150-200 cm                        | 0.63   | 0.92   | 1.04   | ND      | 0.97    |

#### Depth

| Manganese (Mehlich III ppm) | LR # 4 | LR # 6 | LR # 8 | LR # 12 | LR # 13 |
|-----------------------------|--------|--------|--------|---------|---------|
| 0-5 cm                      | 249    | 199    | 310    | 198     | 292     |
| 5-10 cm                     | 219    | 122    | 273    | 256     | 312     |
| 10-15 cm                    | 152    | 62     | 279    | 265     | 347     |
| 15-20 cm                    | 143    | 35     | 213    | 307     | 308     |
| 20-30 cm                    | 105    | 20     | 166    | 214     | 252     |
| 30-50 cm                    | 53     | 4      | 155    | 87      | 114     |
| 50-100 cm                   | 8      | 2      | 46     | 32      | 42      |
| 100-150 cm                  | 2      | 1      | 18     | 18      | 4       |
| 150-200 cm                  | 1      | 1      | ND     | 5       | 4       |

| Manganese (Mehlich III ppm) | Con # 1 | Con # 5 | Con # 7 | Con # 11 | Con # 15 |
|-----------------------------|---------|---------|---------|----------|----------|
| 0-5 cm                      | 274     | 336     | 301     | 122      | 288      |
| 5-10 cm                     | 215     | 289     | 298     | 104      | 359      |
| 10-15 cm                    | 145     | 262     | 238     | 346      | 335      |
| 15-20 cm                    | 150     | 219     | 150     | 49       | 306      |
| 20-30 cm                    | 169     | 186     | 98      | 26       | 229      |
| 30-50 cm                    | 94      | 114     | 34      | 6        | 120      |
| 50-100 cm                   | 29      | 34      | 21      | 2        | 59       |
| 100-150 cm                  | ND      | 5       | 22      | 0        | 2        |
| 150-200 cm                  | ND      | 5       | 9       | 1        | 3        |

| Manganese (Mehlich III ppm) | LA # 2 | LA # 3 | LA # 9 | LA # 10 | LA # 14 |
|-----------------------------|--------|--------|--------|---------|---------|
| 0-5 cm                      | 248    | 257    | 283    | 334     | 248     |
| 5-10 cm                     | 252    | 282    | 276    | 207     | 268     |
| 10-15 cm                    | 221    | 235    | 277    | 149     | 360     |
| 15-20 cm                    | 193    | 220    | 249    | 143     | 351     |
| 20-30 cm                    | 193    | 220    | 260    | 167     | 168     |
| 30-50 cm                    | 165    | 131    | 196    | 65      | 130     |
| 50-100 cm                   | 44     | 50     | 31     | 40      | 45      |
| 100-150 cm                  | 8      | 7      | 17     | ND      | 4       |
| 150-200 cm                  | 4      | 6      | 4      | ND      | 4       |

Depth

| Nitrogen - ammonium (KCl ppm) | LR # 4 | LR # 6 | LR # 8 | LR # 12 | LR # 13 |
|-------------------------------|--------|--------|--------|---------|---------|
| 0-5 cm                        | 0.46   | 0.09   | 0.52   | 0.45    | 0.17    |
| 5-10 cm                       | 0.35   | 0.08   | 0.39   | 0.27    | 0.16    |
| 10-15 cm                      | 0.23   | 0.11   | 0.66   | 0.11    | 0.27    |
| 15-20 cm                      | 0.16   | 0.06   | 0.26   | 0.08    | 0.21    |
| 20-30 cm                      | 0.21   | 0.12   | 0.31   | 0.36    | 0.26    |
| 30-50 cm                      | 0.12   | 0.06   | 0.10   | 0.29    | 0.23    |
| 50-100 cm                     | 0.23   | 0.05   | 0.09   | 0.30    | 0.08    |
| 100-150 cm                    | 0.09   | 0.07   | 0.08   | 0.27    | 0.20    |
| 150-200 cm                    | 0.15   | 0.13   | ND     | 0.19    | 0.07    |

| Nitrogen - ammonium (KCl ppm) | Con # 1 | Con # 5 | Con # 7 | Con # 11 | Con # 15 |
|-------------------------------|---------|---------|---------|----------|----------|
| 0-5 cm                        | 0.15    | 0.14    | 0.36    | 0.48     | 0.23     |
| 5-10 cm                       | 0.47    | 0.12    | 0.26    | 0.20     | 0.14     |
| 10-15 cm                      | 0.12    | 0.06    | 0.24    | 0.21     | 0.25     |
| 15-20 cm                      | 0.22    | 0.04    | 0.25    | 0.19     | 0.20     |
| 20-30 cm                      | 0.36    | 0.01    | 0.26    | 0.21     | 0.30     |
| 30-50 cm                      | 0.14    | 0.01    | 0.24    | 0.19     | 0.29     |
| 50-100 cm                     | 0.04    | 0.02    | 0.16    | 0.10     | 0.17     |
| 100-150 cm                    | ND      | 0.01    | 0.49    | 0.05     | 0.17     |
| 150-200 cm                    | ND      | 0.03    | 0.33    | 0.07     | 0.11     |

| Nitrogen - ammonium (KCl ppm) | LA # 2 | LA # 3 | LA # 9 | LA # 10 | LA # 14 |
|-------------------------------|--------|--------|--------|---------|---------|
| 0-5 cm                        | 0.63   | 0.40   | 0.14   | 0.25    | 0.88    |
| 5-10 cm                       | 0.33   | 0.50   | 0.11   | 0.19    | 0.30    |
| 10-15 cm                      | 0.35   | 0.18   | 0.10   | 0.15    | 0.21    |
| 15-20 cm                      | 0.27   | 0.16   | 0.09   | 0.19    | 0.17    |
| 20-30 cm                      | 0.47   | 0.34   | 0.15   | 0.20    | 0.28    |
| 30-50 cm                      | 0.12   | 0.14   | 0.12   | 0.15    | 0.23    |
| 50-100 cm                     | 0.18   | 0.12   | 0.09   | 0.11    | 0.22    |
| 100-150 cm                    | 0.07   | 0.13   | 0.07   | ND      | 0.25    |
| 150-200 cm                    | 0.05   | 0.07   | 0.06   | ND      | 0.13    |

| Depth      | Nitrogen - nitrate (KCl ppm) | LR # 4 | LR # 6 | LR # 8 | LR # 12 | LR # 13 |
|------------|------------------------------|--------|--------|--------|---------|---------|
| 0-5 cm     |                              | 0.081  | 0.028  | 0.051  | 0.063   | 0.158   |
| 5-10 cm    |                              | 0.031  | 0.018  | 0.034  | 0.015   | 0.062   |
| 10-15 cm   |                              | 0.031  | 0.016  | 0.038  | 0.006   | 0.041   |
| 15-20 cm   |                              | 0.014  | 0.015  | 0.033  | 0.005   | 0.014   |
| 20-30 cm   |                              | 0.017  | 0.012  | 0.025  | 0.008   | 0.013   |
| 30-50 cm   |                              | 0.009  | 0.011  | 0.024  | 0.008   | 0.008   |
| 50-100 cm  |                              | 0.002  | 0.015  | 0.018  | 0.013   | 0.008   |
| 100-150 cm |                              | 0.008  | 0.014  | 0.02   | 0.008   | 0.003   |
| 150-200 cm |                              | 0.01   | 0.021  | ND     | 0.013   | 0.005   |

|            | Nitrogen - nitrate (KCl ppm) | Con # 1 | Con # 5 | Con # 7 | Con # 11 | Con # 15 |
|------------|------------------------------|---------|---------|---------|----------|----------|
| 0-5 cm     |                              | 0.125   | 0.105   | 0.161   | 0.079    | 0.319    |
| 5-10 cm    |                              | 0.057   | 0.115   | 0.111   | 0.024    | 0.162    |
| 10-15 cm   |                              | 0.073   | 0.142   | 0.085   | 0.039    | 0.102    |
| 15-20 cm   |                              | 0.028   | 0.157   | 0.068   | 0.017    | 0.053    |
| 20-30 cm   |                              | 0.009   | 0.287   | 0.064   | 0.017    | 0.036    |
| 30-50 cm   |                              | -0.001  | 0.046   | 0.147   | 0.038    | 0.008    |
| 50-100 cm  |                              | 0.009   | 0.13    | 0.134   | 0.006    | 0.008    |
| 100-150 cm |                              | ND      | 0.029   | 0.034   | 0.007    | 0.003    |
| 150-200 cm |                              | ND      | 0.056   | 0.028   | 0.004    | 0.014    |

|            | Nitrogen - nitrate (KCl ppm) | LA # 2 | LA # 3 | LA # 9 | LA # 10 | LA # 14 |
|------------|------------------------------|--------|--------|--------|---------|---------|
| 0-5 cm     |                              | 0.411  | 0.617  | 0.232  | 0.311   | 0.889   |
| 5-10 cm    |                              | 0.209  | 0.26   | 0.128  | 0.527   | 0.319   |
| 10-15 cm   |                              | 0.125  | 0.157  | 0.09   | 0.243   | 0.27    |
| 15-20 cm   |                              | 0.073  | 0.159  | 0.049  | 0.148   | 0.4     |
| 20-30 cm   |                              | 0.024  | 0.045  | 0.032  | 0.091   | 0.07    |
| 30-50 cm   |                              | 0.013  | 0.05   | 0.023  | 0.105   | 0.245   |
| 50-100 cm  |                              | 0.016  | 0.11   | 0.025  | ND      | 0.237   |
| 100-150 cm |                              | 0.028  | 0.069  | 0.026  | ND      | 0.231   |
| 150-200 cm |                              | 0.024  | 0.056  | 0.016  | ND      | 0.032   |

| Depth      | Nitrogen total (%) | LR # 4 | LR # 6 | LR # 8 | LR # 12 | LR # 13 |
|------------|--------------------|--------|--------|--------|---------|---------|
| 0-5 cm     |                    | 0.383  | 0.382  | 0.443  | 0.341   | 0.399   |
| 5-10 cm    |                    | 0.238  | 0.250  | 0.304  | 0.281   | 0.280   |
| 10-15 cm   |                    | 0.164  | 0.200  | 0.262  | 0.262   | 0.238   |
| 15-20 cm   |                    | 0.132  | 0.158  | 0.192  | 0.216   | 0.187   |
| 20-30 cm   |                    | 0.110  | 0.111  | 0.147  | 0.144   | 0.144   |
| 30-50 cm   |                    | 0.089  | 0.072  | 0.115  | 0.103   | 0.086   |
| 50-100 cm  |                    | 0.054  | 0.046  | 0.076  | 0.061   | 0.057   |
| 100-150 cm |                    | 0.034  | 0.023  | 0.050  | 0.040   | 0.025   |
| 150-200 cm |                    | 0.026  | 0.024  | ND     | 0.026   | 0.017   |

|            | Nitrogen total (%) | Con # 1 | Con # 5 | Con # 7 | Con # 11 | Con # 15 |
|------------|--------------------|---------|---------|---------|----------|----------|
| 0-5 cm     |                    | 0.431   | 0.470   | 0.513   | 0.445    | 0.464    |
| 5-10 cm    |                    | 0.290   | 0.302   | 0.340   | 0.254    | 0.258    |
| 10-15 cm   |                    | 0.214   | 0.264   | 0.258   | 0.227    | 0.220    |
| 15-20 cm   |                    | 0.190   | 0.219   | 0.214   | 0.176    | 0.153    |
| 20-30 cm   |                    | 0.157   | 0.139   | 0.157   | 0.134    | 0.101    |
| 30-50 cm   |                    | 0.105   | 0.082   | 0.083   | 0.082    | 0.061    |
| 50-100 cm  |                    | 0.066   | 0.051   | 0.052   | 0.046    | 0.060    |
| 100-150 cm |                    | ND      | 0.028   | 0.034   | 0.033    | 0.034    |
| 150-200 cm |                    | ND      | 0.020   | 0.031   | 0.019    | 0.027    |

|            | Nitrogen total (%) | LA # 2 | LA # 3 | LA # 9 | LA # 10 | LA # 14 |
|------------|--------------------|--------|--------|--------|---------|---------|
| 0-5 cm     |                    | 0.561  | 0.493  | 0.507  | 0.415   | 0.556   |
| 5-10 cm    |                    | 0.329  | 0.326  | 0.305  | 0.283   | 0.375   |
| 10-15 cm   |                    | 0.262  | 0.248  | 0.260  | 0.227   | 0.298   |
| 15-20 cm   |                    | 0.214  | 0.209  | 0.194  | 0.229   | 0.240   |
| 20-30 cm   |                    | 0.130  | 0.151  | 0.127  | 0.142   | 0.151   |
| 30-50 cm   |                    | 0.083  | 0.082  | 0.078  | 0.083   | 0.104   |
| 50-100 cm  |                    | 0.068  | 0.070  | 0.053  | 0.057   | 0.061   |
| 100-150 cm |                    | 0.027  | 0.041  | 0.041  | ND      | 0.029   |
| 150-200 cm |                    | 0.024  | 0.030  | 0.036  | ND      | 0.019   |

Depth

|            | pH CaCl2 | LR # 4 | LR # 6 | LR # 8 | LR # 12 | LR # 13 |
|------------|----------|--------|--------|--------|---------|---------|
| 0-5 cm     |          | 4.5    | 4.6    | 4.3    | 4.6     | 4.4     |
| 5-10 cm    |          | 4.5    | 4.6    | 4.4    | 4.7     | 4.5     |
| 10-15 cm   |          | 4.4    | 4.4    | 4.5    | 4.9     | 4.6     |
| 15-20 cm   |          | 4.4    | 4.4    | 4.4    | 4.8     | 4.7     |
| 20-30 cm   |          | 4.3    | 4.3    | 4.4    | 4.9     | 4.5     |
| 30-50 cm   |          | 4.3    | 4.2    | 4.4    | 4.6     | 4.4     |
| 50-100 cm  |          | 4.2    | 4.2    | 4.3    | 4.4     | 4.3     |
| 100-150 cm |          | 4.2    | 4.2    | 4.3    | 4.3     | 4.2     |
| 150-200 cm |          | 4.2    | 4.2    | ND     | 4.2     | 4.1     |

|            | pH CaCl2 | Con # 1 | Con # 5 | Con # 7 | Con # 11 | Con # 15 |
|------------|----------|---------|---------|---------|----------|----------|
| 0-5 cm     |          | 4.4     | 5.0     | 4.8     | 4.7      | 4.9      |
| 5-10 cm    |          | 4.5     | 4.7     | 4.9     | 4.4      | 4.9      |
| 10-15 cm   |          | 4.4     | 4.6     | 4.7     | 4.2      | 4.8      |
| 15-20 cm   |          | 4.4     | 4.4     | 4.4     | 4.2      | 4.7      |
| 20-30 cm   |          | 4.4     | ND      | 4.4     | 4.1      | 4.5      |
| 30-50 cm   |          | 4.3     | 4.2     | 4.2     | 4.1      | 4.5      |
| 50-100 cm  |          | 4.3     | 4.2     | 4.2     | 4.2      | 4.3      |
| 100-150 cm |          | ND      | 4.2     | 4.3     | 4.1      | 4.3      |
| 150-200 cm |          | ND      | 4.1     | 4.3     | 4.1      | 4.2      |

|            | pH CaCl2 | LA # 2 | LA # 3 | LA # 9 | LA # 10 | LA # 14 |
|------------|----------|--------|--------|--------|---------|---------|
| 0-5 cm     |          | 5.3    | 5.2    | 5.2    | 5.3     | 5.3     |
| 5-10 cm    |          | 5.3    | 5.2    | 5.1    | 4.9     | 5.3     |
| 10-15 cm   |          | 5.3    | 5.1    | 5.0    | 4.4     | 5.3     |
| 15-20 cm   |          | 5.4    | 5.1    | 4.9    | 4.1     | 5.4     |
| 20-30 cm   |          | 4.8    | 4.7    | 4.6    | 4.2     | 4.8     |
| 30-50 cm   |          | 4.4    | 4.5    | 4.6    | 4.1     | 4.4     |
| 50-100 cm  |          | 4.3    | 4.4    | 4.5    | 4.2     | 4.3     |
| 100-150 cm |          | 4.2    | 4.3    | 4.5    | ND      | 4.2     |
| 150-200 cm |          | 4.1    | 4.1    | 4.4    | ND      | 4.1     |

Depth

|            | pH H2O | LR # 4 | LR # 6 | LR # 8 | LR # 12 | LR # 13 |
|------------|--------|--------|--------|--------|---------|---------|
| 0-5 cm     |        | 5.2    | 4.8    | 4.9    | 5.3     | 4.9     |
| 5-10 cm    |        | 5.1    | 5.1    | 5.0    | 5.4     | 5.1     |
| 10-15 cm   |        | 5.1    | 4.8    | 5.2    | 5.6     | 5.2     |
| 15-20 cm   |        | 5.1    | 5.0    | 5.0    | 5.6     | 5.2     |
| 20-30 cm   |        | 4.9    | 4.9    | 5.1    | 5.5     | 5.0     |
| 30-50 cm   |        | 4.8    | 4.8    | 4.8    | 5.1     | 4.8     |
| 50-100 cm  |        | 4.6    | 4.6    | 4.8    | 4.9     | 4.8     |
| 100-150 cm |        | 4.6    | 4.6    | 4.9    | 4.7     | 4.6     |
| 150-200 cm |        | 4.6    | 4.6    | ND     | 4.7     | 4.5     |

|            | pH H2O | Con # 1 | Con # 5 | Con # 7 | Con # 11 | Con # 15 |
|------------|--------|---------|---------|---------|----------|----------|
| 0-5 cm     |        | 4.9     | 5.6     | 5.4     | 5.2      | 5.5      |
| 5-10 cm    |        | 5.1     | 5.2     | 5.5     | 5.2      | 5.5      |
| 10-15 cm   |        | 5.0     | 5.1     | 5.3     | 4.9      | 5.4      |
| 15-20 cm   |        | 5.0     | 5.0     | 4.9     | 5.0      | 5.3      |
| 20-30 cm   |        | 5.0     | 4.9     | 4.9     | 5.0      | 5.0      |
| 30-50 cm   |        | 4.9     | 4.9     | 4.7     | 5.0      | 5.0      |
| 50-100 cm  |        | 4.9     | 4.9     | 4.6     | 4.9      | 4.8      |
| 100-150 cm |        | ND      | 4.7     | 4.6     | 4.9      | 4.7      |
| 150-200 cm |        | ND      | 4.7     | 4.7     | 4.7      | 4.6      |

|            | pH H2O | LA # 2 | LA # 3 | LA # 9 | LA # 10 | LA # 14 |
|------------|--------|--------|--------|--------|---------|---------|
| 0-5 cm     |        | 5.7    | 5.7    | 5.8    | 5.8     | 5.7     |
| 5-10 cm    |        | 5.9    | 5.9    | 5.8    | 5.4     | 5.9     |
| 10-15 cm   |        | 5.8    | 5.7    | 5.7    | 5.1     | 5.8     |
| 15-20 cm   |        | 6.0    | 5.7    | 5.5    | 4.8     | 6.0     |
| 20-30 cm   |        | 5.2    | 5.3    | 5.3    | 4.8     | 5.2     |
| 30-50 cm   |        | 4.8    | 5.1    | 5.3    | 4.7     | 4.8     |
| 50-100 cm  |        | 4.7    | 5.0    | 5.2    | 4.7     | 4.7     |
| 100-150 cm |        | 4.6    | 4.9    | 5.1    | ND      | 4.6     |
| 150-200 cm |        | 4.6    | 4.8    | 5.0    | ND      | 4.6     |



| Depth      | Phosphorus (Mehlich III ppm) | LR # 4 | LR # 6 | LR # 8 | LR # 12 | LR # 13 |
|------------|------------------------------|--------|--------|--------|---------|---------|
| 0-5 cm     |                              | 1.85   | 1.44   | 1.59   | 1.95    | 1.53    |
| 5-10 cm    |                              | 1.55   | 1.09   | 1.29   | 1.97    | 1.27    |
| 10-15 cm   |                              | 1.32   | 1.09   | 1.14   | 1.20    | 1.22    |
| 15-20 cm   |                              | 1.22   | 0.99   | 0.99   | 1.47    | 1.11    |
| 20-30 cm   |                              | 1.01   | 0.83   | 0.87   | 1.13    | 0.93    |
| 30-50 cm   |                              | 0.86   | 0.60   | 0.57   | 0.68    | 0.87    |
| 50-100 cm  |                              | 0.71   | 0.36   | 0.55   | 0.75    | 0.72    |
| 100-150 cm |                              | 0.47   | 0.27   | 0.34   | 0.67    | 0.37    |
| 150-200 cm |                              | 0.31   | 0.16   | ND     | 0.46    | 0.27    |

| Depth      | Phosphorus (Mehlich III ppm) | Con # 1 | Con # 5 | Con # 7 | Con # 11 | Con # 15 |
|------------|------------------------------|---------|---------|---------|----------|----------|
| 0-5 cm     |                              | 1.58    | 1.76    | 1.84    | 2.15     | 2.33     |
| 5-10 cm    |                              | 1.18    | 1.30    | 1.39    | 1.44     | 1.57     |
| 10-15 cm   |                              | 1.10    | 1.22    | 1.14    | 1.39     | 1.39     |
| 15-20 cm   |                              | 1.09    | 1.05    | 1.00    | 1.16     | 1.26     |
| 20-30 cm   |                              | 0.97    | 0.82    | 0.97    | 1.02     | 1.22     |
| 30-50 cm   |                              | 0.67    | 0.76    | 0.53    | 0.59     | 1.04     |
| 50-100 cm  |                              | 0.49    | 0.51    | 0.34    | 0.43     | 0.60     |
| 100-150 cm |                              | ND      | 0.30    | 0.24    | 0.11     | 0.43     |
| 150-200 cm |                              | ND      | 0.18    | 0.24    | 0.06     | 0.24     |

| Depth      | Phosphorus (Mehlich III ppm) | LA # 2 | LA # 3 | LA # 9 | LA # 10 | LA # 14 |
|------------|------------------------------|--------|--------|--------|---------|---------|
| 0-5 cm     |                              | 2.92   | 2.44   | 2.28   | 3.02    | 2.52    |
| 5-10 cm    |                              | 1.98   | 1.86   | 1.46   | 1.96    | 1.79    |
| 10-15 cm   |                              | 1.68   | 1.52   | 1.20   | 1.75    | 1.26    |
| 15-20 cm   |                              | 1.56   | 1.48   | 1.05   | 0.99    | 1.18    |
| 20-30 cm   |                              | 1.15   | 1.16   | 0.95   | 0.92    | 0.92    |
| 30-50 cm   |                              | 0.87   | 0.95   | 0.93   | 0.66    | 0.87    |
| 50-100 cm  |                              | 0.64   | 0.75   | 0.68   | 0.41    | 0.57    |
| 100-150 cm |                              | 0.35   | 0.49   | 0.53   | ND      | 0.27    |
| 150-200 cm |                              | 0.37   | 0.30   | 0.36   | ND      | 0.26    |

| Depth      | Phosphorus total (ppm ) | LR # 4 | LR # 6 | LR # 8 | LR # 12 | LR # 13 |
|------------|-------------------------|--------|--------|--------|---------|---------|
| 0-5 cm     |                         | 271    | 308    | 319    | 309     | 377     |
| 5-10 cm    |                         | 239    | 240    | 232    | 338     | 318     |
| 10-15 cm   |                         | 194    | 189    | 220    | 299     | 245     |
| 15-20 cm   |                         | 164    | 161    | 192    | 249     | 221     |
| 20-30 cm   |                         | 170    | 145    | 155    | 217     | 206     |
| 30-50 cm   |                         | 126    | 114    | 115    | 185     | 140     |
| 50-100 cm  |                         | 85     | 104    | 94     | 184     | 110     |
| 100-150 cm |                         | 84     | 164    | 66     | 87      | 113     |
| 150-200 cm |                         | 67     | 144    | ND     | 90      | 130     |

|            | Phosphorus total (ppm ) | Con # 1 | Con # 5 | Con # 7 | Con # 11 | Con # 15 |
|------------|-------------------------|---------|---------|---------|----------|----------|
| 0-5 cm     |                         | 313     | 327     | 330     | 368      | 436      |
| 5-10 cm    |                         | 242     | 277     | 251     | 296      | 276      |
| 10-15 cm   |                         | 210     | 281     | 202     | 257      | 264      |
| 15-20 cm   |                         | 195     | 271     | 199     | 270      | 211      |
| 20-30 cm   |                         | 179     | 200     | 148     | 163      | 160      |
| 30-50 cm   |                         | 157     | 136     | 116     | 106      | 125      |
| 50-100 cm  |                         | 119     | 85      | 106     | 60       | 153      |
| 100-150 cm |                         | ND      | 54      | 159     | 74       | 178      |
| 150-200 cm |                         | ND      | 57      | 129     | 93       | 131      |

|            | Phosphorus total (ppm ) | LA # 2 | LA # 3 | LA # 9 | LA # 10 | LA # 14 |
|------------|-------------------------|--------|--------|--------|---------|---------|
| 0-5 cm     |                         | 302    | 332    | 329    | 294     | 398     |
| 5-10 cm    |                         | 214    | 252    | 238    | 248     | 325     |
| 10-15 cm   |                         | 212    | 227    | 212    | 193     | 282     |
| 15-20 cm   |                         | 169    | 236    | 193    | 207     | 250     |
| 20-30 cm   |                         | 138    | 167    | 140    | 157     | 174     |
| 30-50 cm   |                         | 96     | 148    | 94     | 106     | 136     |
| 50-100 cm  |                         | 70     | 112    | 73     | 86      | 109     |
| 100-150 cm |                         | 33     | 94     | 62     | ND      | 126     |
| 150-200 cm |                         | 35     | 95     | 54     | ND      | 112     |

#### Depth

|            | Potassium (Mehlich III cmol kg-1) | LR # 4 | LR # 6 | LR # 8 | LR # 12 | LR # 13 |
|------------|-----------------------------------|--------|--------|--------|---------|---------|
| 0-5 cm     |                                   | 0.399  | 0.180  | 0.153  | 0.168   | 0.181   |
| 5-10 cm    |                                   | 0.209  | 0.021  | 0.066  | 0.181   | 0.089   |
| 10-15 cm   |                                   | 0.150  | 0.438  | 0.067  | ND      | 0.088   |
| 15-20 cm   |                                   | 0.147  | 0.137  | 0.057  | 0.174   | 0.076   |
| 20-30 cm   |                                   | 0.204  | 0.090  | 0.031  | 0.107   | 0.052   |
| 30-50 cm   |                                   | 0.116  | 0.065  | 0.042  | 0.028   | 0.037   |
| 50-100 cm  |                                   | 0.082  | 0.046  | 0.038  | 0.021   | 0.018   |
| 100-150 cm |                                   | 0.064  | 0.061  | ND     | 0.019   | 0.059   |
| 150-200 cm |                                   | 0.067  | 0.057  | ND     | 0.018   | 0.020   |

|            | Potassium (Mehlich III cmol kg-1) | Con # 1 | Con # 5 | Con # 7 | Con # 11 | Con # 15 |
|------------|-----------------------------------|---------|---------|---------|----------|----------|
| 0-5 cm     |                                   | 0.128   | 0.209   | 0.196   | 0.236    | 0.354    |
| 5-10 cm    |                                   | 0.072   | 0.183   | 0.144   | 0.170    | 0.330    |
| 10-15 cm   |                                   | 0.072   | 0.138   | 0.144   | 0.177    | 0.302    |
| 15-20 cm   |                                   | 0.074   | 0.110   | 0.077   | ND       | 0.263    |
| 20-30 cm   |                                   | 0.072   | 0.078   | 0.131   | 0.157    | 0.212    |
| 30-50 cm   |                                   | 0.041   | 0.064   | 0.057   | 0.112    | 0.146    |
| 50-100 cm  |                                   | 0.034   | 0.068   | 0.034   | 0.151    | 0.128    |
| 100-150 cm |                                   | ND      | 0.035   | 0.024   | 0.116    | 0.132    |
| 150-200 cm |                                   | ND      | 0.025   | 0.012   | 0.136    | 0.140    |

| Potassium (Mehlich III cmol kg-1) | LA # 2 | LA # 3 | LA # 9 | LA # 10 | LA # 14 |
|-----------------------------------|--------|--------|--------|---------|---------|
| 0-5 cm                            | 0.337  | 0.161  | 0.332  | 0.150   | 0.196   |
| 5-10 cm                           | 0.298  | 0.166  | 0.306  | 0.076   | 0.147   |
| 10-15 cm                          | 0.350  | 0.125  | 0.288  | 0.070   | 0.145   |
| 15-20 cm                          | 0.309  | 0.115  | 0.226  | 0.059   | 0.108   |
| 20-30 cm                          | 0.344  | 0.089  | 0.153  | 0.051   | 0.076   |
| 30-50 cm                          | 0.313  | 0.077  | 0.156  | 0.038   | 0.035   |
| 50-100 cm                         | 0.104  | 0.126  | 0.089  | 0.027   | 0.034   |
| 100-150 cm                        | 0.008  | 0.012  | 0.061  | ND      | 0.017   |
| 150-200 cm                        | 0.063  | 0.016  | 0.055  | ND      | 0.020   |

Depth

| Zinc (Mehlich III cmol 1000 kg-1) | LR # 4 | LR # 6 | LR # 8 | LR # 12 | LR # 13 |
|-----------------------------------|--------|--------|--------|---------|---------|
| 0-5 cm                            | 5.450  | 4.046  | 7.272  | 5.107   | 4.850   |
| 5-10 cm                           | 4.159  | 0.333  | 3.648  | 5.281   | 3.040   |
| 10-15 cm                          | 2.807  | 0.000  | 4.612  | 2.180   | 2.859   |
| 15-20 cm                          | 3.664  | 0.768  | 2.902  | 4.419   | 1.902   |
| 20-30 cm                          | 2.859  | 0.000  | 1.190  | 1.239   | 0.664   |
| 30-50 cm                          | 1.765  | 0.000  | 0.321  | 0.725   | 0.505   |
| 50-100 cm                         | 1.963  | 0.000  | 0.844  | 0.000   | 0.508   |
| 100-150 cm                        | 1.679  | 0.199  | 0.000  | 0.801   | 0.000   |
| 150-200 cm                        | 1.667  | 0.000  | 0.000  | 0.703   | 0.535   |

| Zinc (Mehlich III cmol 1000 kg-1) | Con # 1 | Con # 5 | Con # 7 | Con # 11 | Con # 15 |
|-----------------------------------|---------|---------|---------|----------|----------|
| 0-5 cm                            | 2.037   | 6.080   | 7.370   | 5.214    | 12.223   |
| 5-10 cm                           | 0.554   | 2.642   | 3.823   | 1.942    | 6.379    |
| 10-15 cm                          | 0.000   | 1.651   | 1.544   | 4.801    | 4.780    |
| 15-20 cm                          | 0.092   | 1.086   | 0.138   | 1.526    | 3.187    |
| 20-30 cm                          | 0.477   | 0.000   | 0.000   | 1.810    | 2.596    |
| 30-50 cm                          | 0.202   | 0.428   | 0.000   | 0.049    | 1.052    |
| 50-100 cm                         | 0.000   | 0.865   | 0.000   | 1.006    | 1.098    |
| 100-150 cm                        | 0.000   | 0.000   | 0.000   | 0.404    | 0.131    |
| 150-200 cm                        | ND      | 0.000   | 0.000   | 0.657    | 0.612    |

| Zinc (Mehlich III cmol 1000 kg-1) | LA # 2 | LA # 3 | LA # 9 | LA # 10 | LA # 14 |
|-----------------------------------|--------|--------|--------|---------|---------|
| 0-5 cm                            | 6.911  | 8.691  | 9.765  | 12.602  | 11.465  |
| 5-10 cm                           | 1.557  | 4.223  | 4.807  | 2.911   | 7.419   |
| 10-15 cm                          | 0.511  | 2.049  | 3.180  | 2.058   | 4.865   |
| 15-20 cm                          | 1.187  | 1.884  | 0.000  | 0.251   | 0.966   |
| 20-30 cm                          | 1.009  | 1.287  | 0.000  | 0.538   | 0.920   |
| 30-50 cm                          | 0.896  | 0.716  | 0.000  | 0.000   | 1.844   |
| 50-100 cm                         | 0.000  | 0.511  | 0.000  | 0.000   | 0.416   |
| 100-150 cm                        | 0.300  | 0.743  | 0.000  | 0.000   | 0.370   |
| 150-200 cm                        | 0.214  | 0.636  | 0.000  | 0.000   | 0.443   |

Modelled soil nutrient concentrations, mean and 95% confidence intervals (CI);

Con. = control; LR = litter removal; LA = litter addition.

| Calcium cmoles kg <sup>-1</sup> (Mehlich III)   |         |       |           |         |         |       |
|-------------------------------------------------|---------|-------|-----------|---------|---------|-------|
| Depth (cm)                                      | LR mean | LR CI | Con. Mean | Con. CI | LA mean | LA CI |
| 0-5                                             | 4.30    | 1.67  | 6.07      | 1.75    | 10.72   | 1.81  |
| 5-10                                            | 4.04    | 0.83  | 4.62      | 0.87    | 6.64    | 0.90  |
| 10-15                                           | 3.63    | 0.75  | 3.79      | 0.79    | 4.94    | 0.82  |
| 15-20                                           | 3.19    | 0.71  | 3.16      | 0.74    | 3.93    | 0.77  |
| 20-30                                           | 2.58    | 0.66  | 2.42      | 0.68    | 2.98    | 0.70  |
| 30-50                                           | 1.74    | 0.65  | 1.50      | 0.68    | 1.95    | 0.70  |
| 50-100                                          | 0.91    | 0.65  | 0.65      | 0.67    | 1.00    | 0.69  |
| 100-150                                         | 0.51    | 0.61  | 0.27      | 0.63    | 0.50    | 0.64  |
| 150-200                                         | 0.31    | 0.63  | 0.09      | 0.67    | 0.22    | 0.69  |
| Carbon% (total)                                 |         |       |           |         |         |       |
| Depth (cm)                                      | LR mean | LR CI | Con. Mean | Con. CI | LA mean | LA CI |
| 0-5                                             | 4.64    | 0.34  | 5.37      | 0.45    | 6.16    | 0.39  |
| 5-10                                            | 2.89    | 0.16  | 3.22      | 0.20    | 3.63    | 0.18  |
| 10-15                                           | 2.18    | 0.10  | 2.34      | 0.13    | 2.61    | 0.12  |
| 15-20                                           | 1.76    | 0.08  | 1.85      | 0.11    | 2.03    | 0.10  |
| 20-30                                           | 1.38    | 0.07  | 1.40      | 0.11    | 1.52    | 0.09  |
| 30-50                                           | 0.99    | 0.07  | 0.96      | 0.10    | 1.01    | 0.08  |
| 50-100                                          | 0.61    | 0.06  | 0.56      | 0.08    | 0.58    | 0.07  |
| 100-150                                         | 0.38    | 0.06  | 0.35      | 0.07    | 0.36    | 0.06  |
| 150-200                                         | 0.24    | 0.06  | 0.23      | 0.09    | 0.24    | 0.07  |
| Magnesium cmoles kg <sup>-1</sup> (Mehlich III) |         |       |           |         |         |       |
| Depth (cm)                                      | LR mean | LR CI | Con. Mean | Con. CI | LA mean | LA CI |
| 0-5                                             | 2.35    | 0.57  | 3.22      | 0.57    | 3.63    | 0.57  |
| 5-10                                            | 2.35    | 0.49  | 2.74      | 0.49    | 2.84    | 0.49  |
| 10-15                                           | 2.29    | 0.48  | 2.48      | 0.49    | 2.49    | 0.49  |
| 15-20                                           | 2.21    | 0.49  | 2.29      | 0.49    | 2.27    | 0.49  |
| 20-30                                           | 2.09    | 0.49  | 2.06      | 0.49    | 2.04    | 0.49  |
| 30-50                                           | 1.86    | 0.48  | 1.71      | 0.48    | 1.76    | 0.48  |
| 50-100                                          | 1.45    | 0.48  | 1.20      | 0.48    | 1.40    | 0.48  |
| 100-150                                         | 1.07    | 0.51  | 0.75      | 0.51    | 1.13    | 0.51  |
| 150-200                                         | 0.81    | 0.54  | 0.45      | 0.54    | 0.95    | 0.54  |
| Nitrogen ammonium mg kg <sup>-1</sup> (KCl)     |         |       |           |         |         |       |
| Depth (cm)                                      | LR mean | LR CI | Con. Mean | Con. CI | LA mean | LA CI |
| 0-5                                             | 0.342   | 0.151 | 0.276     | 0.151   | 0.381   | 0.151 |
| 5-10                                            | 0.265   | 0.079 | 0.227     | 0.079   | 0.291   | 0.079 |
| 10-15                                           | 0.233   | 0.067 | 0.205     | 0.067   | 0.251   | 0.067 |
| 15-20                                           | 0.214   | 0.065 | 0.191     | 0.065   | 0.226   | 0.065 |
| 20-30                                           | 0.196   | 0.065 | 0.177     | 0.065   | 0.201   | 0.065 |
| 30-50                                           | 0.177   | 0.064 | 0.160     | 0.064   | 0.171   | 0.064 |
| 50-100                                          | 0.156   | 0.060 | 0.139     | 0.061   | 0.134   | 0.061 |
| 100-150                                         | 0.142   | 0.063 | 0.122     | 0.065   | 0.106   | 0.064 |
| 150-200                                         | 0.133   | 0.070 | 0.112     | 0.073   | 0.088   | 0.072 |
| Nitrogen nitrate mg kg <sup>-1</sup> (KCl)      |         |       |           |         |         |       |
| Depth (cm)                                      | LR mean | LR CI | Con. Mean | Con. CI | LA mean | LA CI |
| 0-5                                             | 0.068   | 0.042 | 0.141     | 0.077   | 0.487   | 0.096 |

|         |       |       |       |       |       |       |
|---------|-------|-------|-------|-------|-------|-------|
| 5-10    | 0.037 | 0.035 | 0.100 | 0.045 | 0.274 | 0.053 |
| 10-15   | 0.025 | 0.034 | 0.082 | 0.039 | 0.192 | 0.047 |
| 15-20   | 0.019 | 0.033 | 0.072 | 0.038 | 0.147 | 0.047 |
| 20-30   | 0.014 | 0.033 | 0.061 | 0.038 | 0.110 | 0.047 |
| 30-50   | 0.011 | 0.033 | 0.049 | 0.037 | 0.079 | 0.046 |
| 50-100  | 0.010 | 0.033 | 0.034 | 0.036 | 0.064 | 0.043 |
| 100-150 | 0.012 | 0.033 | 0.024 | 0.036 | 0.065 | 0.047 |
| 150-200 | 0.014 | 0.033 | 0.017 | 0.038 | 0.068 | 0.054 |

| Nitrogen (total) % |         |       |           |         |         |       |
|--------------------|---------|-------|-----------|---------|---------|-------|
| Depth (cm)         | LR mean | LR CI | Con. Mean | Con. CI | LA mean | LA CI |
| 0-5                | 0.393   | 0.046 | 0.458     | 0.046   | 0.505   | 0.048 |
| 5-10               | 0.284   | 0.017 | 0.315     | 0.017   | 0.348   | 0.019 |
| 10-15              | 0.230   | 0.013 | 0.248     | 0.013   | 0.273   | 0.015 |
| 15-20              | 0.194   | 0.012 | 0.204     | 0.012   | 0.224   | 0.013 |
| 20-30              | 0.154   | 0.009 | 0.158     | 0.010   | 0.172   | 0.010 |
| 30-50              | 0.106   | 0.009 | 0.104     | 0.009   | 0.111   | 0.010 |
| 50-100             | 0.060   | 0.008 | 0.056     | 0.009   | 0.058   | 0.009 |
| 100-150            | 0.037   | 0.007 | 0.034     | 0.007   | 0.036   | 0.007 |
| 150-200            | 0.024   | 0.008 | 0.024     | 0.008   | 0.025   | 0.009 |

| Phosphorus mg kg <sup>-1</sup> (Mehlich III) |         |       |           |         |         |       |
|----------------------------------------------|---------|-------|-----------|---------|---------|-------|
| Depth (cm)                                   | LR mean | LR CI | Con. Mean | Con. CI | LA mean | LA CI |
| 0-5                                          | 1.737   | 0.139 | 1.907     | 0.140   | 2.419   | 0.140 |
| 5-10                                         | 1.367   | 0.120 | 1.448     | 0.120   | 1.829   | 0.120 |
| 10-15                                        | 1.194   | 0.115 | 1.234     | 0.115   | 1.554   | 0.115 |
| 15-20                                        | 1.081   | 0.113 | 1.094     | 0.113   | 1.373   | 0.113 |
| 20-30                                        | 0.961   | 0.112 | 0.945     | 0.112   | 1.182   | 0.112 |
| 30-50                                        | 0.802   | 0.113 | 0.748     | 0.114   | 0.929   | 0.114 |
| 50-100                                       | 0.590   | 0.118 | 0.485     | 0.120   | 0.592   | 0.120 |
| 100-150                                      | 0.418   | 0.126 | 0.272     | 0.127   | 0.317   | 0.127 |
| 150-200                                      | 0.305   | 0.131 | 0.131     | 0.134   | 0.137   | 0.134 |

| Phosphorus total (ppm) |         |       |           |         |         |       |
|------------------------|---------|-------|-----------|---------|---------|-------|
| Depth (cm)             | LR mean | LR CI | Con. Mean | Con. CI | LA mean | LA CI |
| 0-5                    | 315.1   | 27.9  | 340.2     | 28.0    | 325.1   | 28.0  |
| 5-10                   | 253.8   | 23.9  | 269.9     | 23.9    | 252.7   | 23.9  |
| 10-15                  | 225.3   | 22.8  | 237.2     | 22.8    | 219.0   | 22.8  |
| 15-20                  | 206.5   | 22.4  | 215.6     | 22.4    | 196.9   | 22.4  |
| 20-30                  | 186.6   | 22.2  | 192.8     | 22.3    | 173.4   | 22.3  |
| 30-50                  | 160.4   | 22.4  | 162.7     | 22.6    | 142.4   | 22.6  |
| 50-100                 | 125.3   | 23.6  | 122.5     | 23.8    | 100.9   | 23.8  |
| 100-150                | 96.8    | 25.1  | 89.8      | 25.4    | 67.3    | 25.4  |
| 150-200                | 78.0    | 26.3  | 68.3      | 26.7    | 45.1    | 26.7  |

| Depth<br>(cm) | Potassium cmoles kg <sup>-1</sup> (Mehlich III) |       |           |         |         |       |
|---------------|-------------------------------------------------|-------|-----------|---------|---------|-------|
|               | LR mean                                         | LR CI | Con. Mean | Con. CI | LA mean | LA CI |
| 0-5           | 0.220                                           | 0.086 | 0.254     | 0.072   | 0.239   | 0.091 |
| 5-10          | 0.154                                           | 0.056 | 0.182     | 0.053   | 0.203   | 0.058 |
| 10-15         | 0.125                                           | 0.052 | 0.152     | 0.049   | 0.182   | 0.054 |
| 15-20         | 0.108                                           | 0.052 | 0.135     | 0.049   | 0.166   | 0.054 |
| 20-30         | 0.092                                           | 0.052 | 0.118     | 0.048   | 0.147   | 0.054 |
| 30-50         | 0.073                                           | 0.051 | 0.100     | 0.048   | 0.118   | 0.053 |
| 50-100        | 0.052                                           | 0.049 | 0.081     | 0.047   | 0.072   | 0.051 |
| 100-150       | 0.037                                           | 0.050 | 0.068     | 0.047   | 0.032   | 0.052 |
| 150-200       | 0.028                                           | 0.052 | 0.061     | 0.048   | 0.005   | 0.056 |

| Depth<br>(cm) | Zinc cmoles kg <sup>-1</sup> * 1000 (Mehlich III) |       |           |         |         |       |
|---------------|---------------------------------------------------|-------|-----------|---------|---------|-------|
|               | LR mean                                           | LR CI | Con. Mean | Con. CI | LA mean | LA CI |
| 0-5           | 6.48                                              | 2.28  | 6.11      | 1.95    | 8.52    | 1.78  |
| 5-10          | 3.49                                              | 1.16  | 3.22      | 1.05    | 4.17    | 0.99  |
| 10-15         | 2.32                                              | 0.90  | 2.07      | 0.83    | 2.48    | 0.80  |
| 15-20         | 1.68                                              | 0.84  | 1.43      | 0.77    | 1.56    | 0.75  |
| 20-30         | 1.15                                              | 0.83  | 0.88      | 0.76    | 0.81    | 0.73  |
| 30-50         | 0.69                                              | 0.81  | 0.39      | 0.74    | 0.17    | 0.72  |
| 50-100        | 0.42                                              | 0.74  | 0.03      | 0.71    | -0.15   | 0.70  |
| 100-150       | 0.39                                              | 0.73  | -0.10     | 0.70    | -0.15   | 0.69  |
| 150-200       | 0.41                                              | 0.77  | -0.14     | 0.72    | -0.09   | 0.70  |

## Tanner, Sheldrake & Turner, Supplementary material. R models.

### Model in R to predict concentrations and confidence intervals (calcium example)

#### GLIMP\_soil\_nutrients\_CALCIIUM

Here we show only the output of the final model. For full description of methods see associated methods document For full analysis including model selection, see associated script ('calcium.R').

In brief: Calcium is modelled against litter treatment (C, L-, L+) and depth, with plot specified as a random effect to control for the repeated sampling (at each depth) within each plot. We use the R package nlme. The response does not vary linearly with depth, and so we use splines. The variance tends to vary with depth (heteroskedasticity) and so we use a variance covariate to model the change in variance with depth. Depth is logged prior to analysis. Significance of fixed effects is ascertained using likelihood ratio tests of nested models. Where there is a significant treatment\*depth interaction, we re-run the model to contrast each of L- and L+ treatments with the controls.

#### Final model

```
zfin=lme(calcium~treatment*ns(mlogdepth,3), random=(~1|plot), data=nutrients, na.action=na.exclude,method="ML", weights=varExp(form=~mlogdepth|treatment))
```

#### Testing for significance - full model

```
zfin=lme(calcium~treatment*ns(mlogdepth,3), random=(~1|plot), data=nutrients, na.action=na.exclude,method="ML", weights=varExp(form=~mlogdepth|treatment))
```

```
zfin1=lme(calcium~treatment+ns(mlogdepth,3), random=(~1|plot), data=nutrients, na.action=na.exclude,method="ML", weights=varExp(form=~mlogdepth|treatment))
```

```
zfin2=lme(calcium~treatment, random=(~1|plot), data=nutrients, na.action=na.exclude,method="ML", weights=varExp(form=~mlogdepth|treatment))
```

```
zfin3=lme(calcium~ns(mlogdepth,3), random=(~1|plot), data=nutrients, na.action=na.exclude,method="ML", weights=varExp(form=~mlogdepth|treatment))
```

```
anova(zfin,zfin1) # significance of interaction
```

| ## | Model | df | AIC | BIC      | logLik   | Test      | L.Ratio | p-value |
|----|-------|----|-----|----------|----------|-----------|---------|---------|
| ## | zfin  | 1  | 17  | 1724.975 | 1773.723 | -845.4876 |         |         |

```
## zfin1      2 11 1737.412 1768.954 -857.7058 1 vs 2 24.43638 4e-04
```

```
anova(zfin1,zfin2) # significance of depth
```

```
##          Model df      AIC      BIC    logLik  Test  L.Ratio p-value
```

```
## zfin1      1 11 1737.412 1768.954 -857.7058
```

```
## zfin2      2  8 1912.036 1934.976 -948.0181 1 vs 2 180.6245 <.0001
```

```
anova(zfin1,zfin3) # significance of treatment
```

```
##          Model df      AIC      BIC    logLik  Test  L.Ratio p-value
```

```
## zfin1      1 11 1737.412 1768.954 -857.7058
```

```
## zfin3      2  9 1734.279 1760.087 -858.1396 1 vs 2 0.8677126 0.648
```

## Testing for significance - litter removal versus control

```
nutrients_Lrem = subset(nutrients, treatment != 'L+')
```

```
Lrem_zfin=lme(calcium~treatment*ns(mlogdepth,3), random=(~1|plot), data=nutrients_Lrem, na.action=na.exclude,method="ML", weights=varExp(form=~mlogdepth|treatment))
```

```
Lrem_zfin1=lme(calcium~treatment+ns(mlogdepth,3), random=(~1|plot), data=nutrients_Lrem, na.action=na.exclude,method="ML", weights=varExp(form=~mlogdepth|treatment))
```

```
Lrem_zfin2=lme(calcium~treatment, random=(~1|plot), data=nutrients_Lrem, na.action=na.exclude,method="ML", weights=varExp(form=~mlogdepth|treatment))
```

```
Lrem_zfin3=lme(calcium~ns(mlogdepth,3), random=(~1|plot), data=nutrients_Lrem, na.action=na.exclude,method="ML", weights=varExp(form=~mlogdepth|treatment))
```

```
anova(Lrem_zfin,Lrem_zfin1) # significance of interaction term
```

```
##          Model df      AIC      BIC    logLik  Test  L.Ratio p-value
```

```
## Lrem_zfin      1 12 1138.961 1168.552 -557.4803
```

```
## Lrem_zfin1     2  9 1139.584 1161.777 -560.7921 1 vs 2 6.62353 0.0849
```

```
anova(Lrem_zfin1,Lrem_zfin2) # significance of depth term
```

```
##          Model df      AIC      BIC    logLik  Test  L.Ratio p-value
```

```
## Lrem_zfin1     1  9 1139.584 1161.777 -560.7921
```

```
## Lrem_zfin2     2  6 1268.803 1283.598 -628.4014 1 vs 2 135.2186 <.0001
```

```
anova(Lrem_zfin1,Lrem_zfin3) # significance of treatment term
```

```
##          Model df      AIC      BIC    logLik  Test  L.Ratio p-value
```

```
## Lrem_zfin1     1  9 1139.584 1161.777 -560.7921
```



```
## Lrem_zfin3      2  8 1137.727 1157.455 -560.8638 1 vs 2 0.1433615  0.705
```

## Testing for significance - litter addition versus control

```
nutrients_Ladd = subset(nutrients, treatment != 'L-')

Ladd_zfin=lme(calcium~treatment*ns(mlogdepth,3), random=(~1|plot), data=nutrients_Ladd, na.action=na.exclude,method="ML", weights=varExp(form=~mlogdepth|treatment))

Ladd_zfin1=lme(calcium~treatment+ns(mlogdepth,3), random=(~1|plot), data=nutrients_Ladd, na.action=na.exclude,method="ML", weights=varExp(form=~mlogdepth|treatment))

Ladd_zfin2=lme(calcium~treatment, random=(~1|plot), data=nutrients_Ladd, na.action=na.exclude,method="ML", weights=varExp(form=~mlogdepth|treatment))

Ladd_zfin3=lme(calcium~ns(mlogdepth,3), random=(~1|plot), data=nutrients_Ladd, na.action=na.exclude,method="ML", weights=varExp(form=~mlogdepth|treatment))

anova(Ladd_zfin,Ladd_zfin1) # significance of interaction term
##           Model df      AIC      BIC    logLik   Test  L.Ratio p-value
## Ladd_zfin      1 12 1155.764 1185.216 -565.8820
## Ladd_zfin1     2  9 1158.173 1180.263 -570.0867 1 vs 2 8.409344  0.0383

anova(Ladd_zfin1,Ladd_zfin2) # significance of depth term
##           Model df      AIC      BIC    logLik   Test  L.Ratio p-value
## Ladd_zfin1     1  9 1158.173 1180.263 -570.0867
## Ladd_zfin2     2  6 1270.398 1285.124 -629.1987 1 vs 2 118.2241 <.0001

anova(Ladd_zfin1,Ladd_zfin3) # significance of treatment term
##           Model df      AIC      BIC    logLik   Test  L.Ratio p-value
## Ladd_zfin1     1  9 1158.173 1180.263 -570.0867
## Ladd_zfin3     2  8 1157.048 1176.683 -570.5242 1 vs 2 0.8749981  0.3496
```

Plot showing partial residuals and 95% CIs against log(depth)

Plots showing 95% CIs at each depth

## Validation of final model

```
# plot residuals against fitted values to examine variance
```

```
zvar=resid(zfin, type='normalized')
zfit=fitted(zfin)
plot(x=zfit,y=zvar, col=nutrients$treatment)
```

```
#plot boxplot of residuals by treatment and mlogdepth to examine patterns in the variance and examine independence
par(mfrow=c(1,2))
plot(resid(zfin, type='normalized') ~ nutrients$treatment, xlab='treatment', ylab='residuals');
boxplot(resid(zfin, type='normalized') ~ nutrients$mlogdepth, xlab='log depth', ylab='residuals')
```

```
#plot q q plot by depth and treatment - to look at normality of fixed effect
qqnorm(resid(zfin, type = 'p'))
```

---

## Model in R for confidence intervals for cumulative nutrients with cumulative depth

```
setwd("C://Users//Tommaso//Desktop")
data <- read.csv("caforR.csv",header=T)

library(lme4)
library(merTools)

M<-lmer(log(Ca)~depth*treat+(1|plot),data)
summary(M)

new.dat<-data.frame(treat=c("Con","LA","LR"),plot="Other",depth=0)

## Predictions using bootstrapping
predFun <- function(fit) {
  predict(fit,new.dat,allow.new.levels =T,re.form=NA)
}

preds <- bootMer(M,nsim=100,FUN=predFun)

Control<-exp(preds$t[,1])
LA<-exp(preds$t[,2])
LR<-exp(preds$t[,3])

quantile(Control,c(0.025,0.975))
quantile(LA,c(0.025,0.975))
quantile(LR,c(0.025,0.975))

## Plot
```

```
plot(Ca~depth,data,col=treat,pch=16,xlab="Soil depth  
(cm)",ylab="Ca",xlim=c(0,200),ylim=c(0,3000))  
legend("topright",c("Control","Litter addition","Litter  
removal"),pch=16,col=c("black","red","green"))
```
